# Supplementary material for: Structural evolution drives diversification of the large LRR‐RLK gene family
Source: PubMed Central journal article supplement (PMC7318236; doi:10.1111/nph.16455), 2020-02-29
Supplement: NPH-226-1492-s002.pdf [file NPH-226-1492-s002.pdf]

# Structural evolution drives diversification of the large LRR-RLK gene family

Jarrett Man<sup>1</sup>, Joseph P. Gallagher<sup>1</sup>, Madelaine Bartlett<sup>1</sup>

<sup>1</sup>Biology Department, University of Massachusetts Amherst. 611 North Pleasant Street, 221 Morrill 3, Amherst, MA, 01003, USA

Article acceptance date: 19 January 2020

## Supporting Information Contents

### Figures

- Fig S1: Clade I gene tree
- Fig S2: Clade II gene tree
- Fig S3: Clade III\_VIIa gene tree
- Fig S4: Clade IV gene tree
- Fig S5: Clade V gene tree
- Fig S6: Clade VI gene tree
- Fig S7: Clade VIIb gene tree
- Fig S8: Clade VIII-1 gene tree
- Fig S9: Clade VIII-2 gene tree
- Fig S10: Clade IX gene tree
- Fig S11: Clade X gene tree
- Fig S12: Clade XI\_XIIb gene tree
- Fig S13: Clade XIIa gene tree
- Fig S14: Clade XIIIa gene tree
- Fig S15: Clade XIIIb gene tree
- Fig S16: Clade XIV gene tree
- Fig S17: Clade XV gene tree
- Fig S18: Model of structural modifications found
- Fig S19: Phylogenetic trees of maize genes in clade XI\_XIIb from different alignment domains
- Fig S20: Alignment showing sequence identity of a maize gene fragment to its paralog
- Fig S21: Backbone tree with gene names

### Tables

- Table S1: Genome annotation and assembly versions used in gene searches
- Table S2: List of maize transcript variants used in gene searches
- Table S3: All discovered genes, their respective clades, protein domains found in coding annotation, and domains found outside their coding annotation
- Table S4: Gene expression analyses
- Table S5: Genes used to construct backbone phylogenetic tree, their clades, and their constraint groups
- Table S6: Gene family size in each taxon by clade
- Table S7: Rate of gene structural variation by clade

## Datasets

Dataset S1: Alignments used to infer clade-specific trees

Dataset S2: Alignments used to infer clade-specific trees after filtering

Dataset S3: Newick format clade-specific tree files

Dataset S4: Sequence alignment from backbone tree

Dataset S5: Sequence alignment from backbone tree after filtering

Dataset S6: Models for backbone tree alignment partitions

Dataset S7: Newick format LRR-RLK constraint tree

Dataset S8: Newick format LRR-RLK backbone best tree

Dataset S9: Newick format files for bootstrap replicate trees used in backbone tree construction

Dataset S10: Alignments used to construct conversion trees shown in Suppl. Fig S19.
